# Supplementary material
Source: PubMed Central journal article supplement (PMC11574939)
Supplement: sj-pdf-1-jcb-10.1177_0271678X241261944.pdf [file sj-pdf-1-jcb-10.1177_0271678X241261944.pdf]

## Appendix 1

### Summary of the papers included in the results

#### PAEDIATRIC TRAUMATIC BRAIN INJURY (29)

| <i>Authors</i>                       | <i>CA Monitoring</i>                       | <i>Cut-off</i>     | <i>Patient population</i>            | <i>Results</i>                                                                                                                                                         |
|--------------------------------------|--------------------------------------------|--------------------|--------------------------------------|------------------------------------------------------------------------------------------------------------------------------------------------------------------------|
| Abecasis et al. (2021) <sup>55</sup> | PRx, Mx, COx                               | PRx<br>0.3         | 12 children, sTBI                    | PRx is the most robust index to assess cerebrovascular reactivity in children with TBI and has prognostic value. Optimal CPP calculation is feasible with PRx and COx. |
| Adelson et al (1998) <sup>63</sup>   | HbD-HbO <sub>2</sub> -Tot<br>Hb /ICP & ABP | NS                 | 10 children, sTBI                    | NIRS reliably detects changes in cerebral hemodynamics.                                                                                                                |
| Appavu et al. (2021) <sup>15</sup>   | PRx, PAx, WPRx                             | PRx,<br>Pax<br>0.3 | 56 children, TBI                     | CA index (PRx, PAx) is associated with outcome (GOSE Ped).                                                                                                             |
| Appavu et al (2022) <sup>57</sup>    | PRx, WPRx                                  | NS                 | 72 children, moTBI/sTBI              | Elevated PRx and wPRx are predictive of post traumatic epilepsy.                                                                                                       |
| Brady et al. (2009) <sup>54</sup>    | PRx                                        | 0                  | 21 children, sTBI                    | PRx is associated with survival and is CPP dependent.                                                                                                                  |
| Chaiwat et al. (2009) <sup>38</sup>  | sARI                                       | 0.4                | 38 children, sTBI                    | Impaired CA associated with poor outcome.                                                                                                                              |
| Deines et al. (2019) <sup>49</sup>   | PI                                         | NS                 | 60 children, mTBI                    | No correlation between PI and outcome at 4-6 weeks.                                                                                                                    |
| Figaji et al. (2009) <sup>41</sup>   | sARI                                       | 0.4                | 24 children, sTBI                    | CA testing may assist clinical decision making.                                                                                                                        |
| Flechet et al. (2018) <sup>12</sup>  | LAx                                        | 0.2                | 259 pt, 117 children                 | Duration and intensity of deranged CA play a role in outcome.                                                                                                          |
| Freeman et al. (2008) <sup>44</sup>  | sARI                                       | 0.4                | 37 children GCS<13                   | Young age >4 years is a risk factor for impaired CA.                                                                                                                   |
| Guiza et al. (2015) <sup>60</sup>    | LAx                                        | 0                  | 261 total pt<br>99 children with TBI | ICP-time burden is associated with worse outcome and children have reduced ability to tolerate ICP insults.                                                            |

|                                           |                             |      |                           |                                                                                                                                                     |
|-------------------------------------------|-----------------------------|------|---------------------------|-----------------------------------------------------------------------------------------------------------------------------------------------------|
| Guiza et al. (2016) <sup>61</sup>         | LAx                         | NS   | 79 children, TBI          | CPP close to recommended CPP values was significantly associated with better outcome and was a significant independent predictor of better outcome. |
| Hockel et al. (2017) <sup>11</sup>        | PRx                         | 0.2  | 17 children, TBI          | CA is correlated with outcome.<br>Time spent with deficient CA has impact on outcome.                                                               |
| Lele et al. (2018) <sup>42</sup>          | sARI                        | 0.4  | 31 children, mTBI         | CA impairment commonly extends to the contralateral hemisphere.                                                                                     |
| Lewis et al. (2015) <sup>52</sup>         | PRx                         | 0.25 | 36 children, TBI          | PRx has prognostic value and can identify CPP targets.                                                                                              |
| Lo et al. (2018) <sup>62</sup>            | LAx<br>DATACAR              | NS   | 99 children, TBI          | There were significantly higher proportions with CPP monitoring time within CPPopt among patients with favourable outcome (GOS 4 and 5).            |
| Moir et al. (2018) <sup>48</sup>          | RoR (sit-to-stand protocol) | NS   | 19 concussed, 18 controls | Impaired CA after concussion, which in some case improves along with clinical symptoms.                                                             |
| Nagel et al. (2016) <sup>53</sup>         | PRx                         | NS   | 10 Infant/children, sTBI  | PRx correlates with 6 months outcome.                                                                                                               |
| Thamjamrassri et al. (2022) <sup>40</sup> | sARI                        | 0.4  | 24 children, TBI          | The co-occurrence of hypotension and cerebral autoregulation may be a sufficiency condition needed to affect TBI outcomes.                          |
| Tontisirin et al. (2007) <sup>47</sup>    | sARI                        | 0.4  | 9 children, sTBI          | CA often changes during the first 10 days from trauma.                                                                                              |
| Vavilala et al. (2004) <sup>37</sup>      | sARI                        | 0.4  | 36 children, sTBI         | The incidence of impaired CA was greatest in sTBI which was associated with poor outcome.                                                           |
| Vavilala et al. (2006) <sup>39</sup>      | sARI                        | 0.4  | 28 children, sTBI         | Impaired CA (<0.4) associated with poor 6 months outcome (GOS<4).                                                                                   |
| Vavilala et al. (2007) <sup>46</sup>      | sARI                        | 0.4  | 15 children, sTBI         | CA is impaired in TBI in most cases. Inflicted TBI has worse outcome compared with non-inflicted TBI.                                               |
| Vavilala et al. (2008) <sup>45</sup>      | sARI                        | 0.4  | 42 children, TBI          | Hemispheric difference in CA.                                                                                                                       |
| Vavilala et al. (2018) <sup>43</sup>      | sARI                        | 0.4  | 6 children, mTBI          | Impaired CA occurs in mild TBI.                                                                                                                     |
| Wellard et al. (2021) <sup>59</sup>       | PRx, wPRx, PAx              | NS   | 30 children,              | Reduction of PRx after a bolus of hyperosmolar therapy.                                                                                             |
| Young et al. (2016) <sup>51</sup>         | PRx                         | 0.2  | 12 Children, TBI          | PRx and deviation of CPP from CPPopt correlate with patient outcome.                                                                                |
| Young et al. (2017) <sup>56</sup>         | PRx                         | NS   | 44 children, sTBI         | Increase in glucose is associated with impaired CA.                                                                                                 |

|                                    |     |    |                   |                                                                                              |
|------------------------------------|-----|----|-------------------|----------------------------------------------------------------------------------------------|
| Zipfel et al. (2021) <sup>58</sup> | PRx | NS | 28 children, sTBI | Hypertonic saline administration restored disturbed CA only in the favourable outcome group. |
|------------------------------------|-----|----|-------------------|----------------------------------------------------------------------------------------------|

#### PEDIATRIC POST CARDIAC ARREST ENCEPHALOPATHY (4)

| <i>Authors</i>                      | <i>CA Monitoring</i>                    | <i>Cut-off</i> | <i>Patient population</i>                    | <i>Results</i>                                                                                                                             |
|-------------------------------------|-----------------------------------------|----------------|----------------------------------------------|--------------------------------------------------------------------------------------------------------------------------------------------|
| Kirschen et al (2021) <sup>66</sup> | COx, MAPopt                             | 0.3            | 34 children, post arrest                     | MAP below NIRS derived MAPopt is associated with worse outcome.                                                                            |
| Lee et al (2014) <sup>65</sup>      | HVx                                     | -1/+1          | 36 children, post arrest                     | Deviation from ABP with optimal CA may predict poor neurological outcome.                                                                  |
| Lovett et al (2018) <sup>68</sup>   | TCD Transient hyperaemic response ratio | NS             | 26 children, post arrest, asphyxia, drowning | Unfavourable outcome had lower cerebral blood flow velocity.<br>Intermittent intact CA was more frequent in those with favourable outcome. |
| Zipfel et al (2022) <sup>67</sup>   | PRx                                     | 0.24           | 19 children, post arrest                     | Significant doses of impaired CA within 72 h after resuscitation are associated with unfavourable outcome.                                 |

#### PAEDIATRIC STROKE (3)

| <i>Authors</i>                    | <i>CA Monitoring</i> | <i>Cut-off</i> | <i>Patient population</i>     | <i>Results</i>                                                                                                                   |
|-----------------------------------|----------------------|----------------|-------------------------------|----------------------------------------------------------------------------------------------------------------------------------|
| Appavu et al (2021) <sup>71</sup> | PRx, wPRx            | NA             | 14 children, AVM              | Disturbed CA associated with worse outcome and acquired epilepsy.                                                                |
| Lee et al (2013) <sup>69</sup>    | COx<br>HVx           | NA<br>-1→+1    | 6 children, Moyamoya disease  | NIRS derived index may identify hemodynamics goals that optimize CA.                                                             |
| Lee et al (2018) <sup>70</sup>    | HVx                  | NA             | 15 children, Moyamoya disease | Deranged CA during surgery was associated with postoperative transient ischemic attacks in children with bilateral vasculopathy. |

#### OTHER PEDIATRIC CONDITIONS (9)

| <i>Authors</i>                        | <i>CA Monitoring</i>                              | <i>Cut-off</i> | <i>Patient population</i>                        | <i>Results</i>                                                                                                                                                                    |
|---------------------------------------|---------------------------------------------------|----------------|--------------------------------------------------|-----------------------------------------------------------------------------------------------------------------------------------------------------------------------------------|
| Janzarik et al (2021) <sup>72</sup>   | Mx; Sx; Dx                                        | NA             | 12 children brain tumour,<br>12 healthy controls | Reduced cerebral autoregulation in patients, that did not reach statistical significance.                                                                                         |
| Jildenstål et al (2021) <sup>74</sup> | Correlation coefficient<br>CrSO <sub>2</sub> /ABP | NA             | 15 children under<br>sevoflurane anaesthesia     | During sevoflurane anaesthesia CBF seems to be “pressure dependent” indicating a poor efficiency of CA.                                                                           |
| Kim et al (2009) <sup>79</sup>        | Oxy-Hb /deoxy-Hb                                  | NA             | 53 healthy children<br>during standing position  | Children with abnormal circulatory responses while standing showed a significant reduction of oxy-Hb compared with normal counterparts, suggesting impaired CA in these children. |
| Ma L et al (2014) <sup>73</sup>       | sARI                                              | 0.4            | 32 children DKA<br><br>50 controls               | Impaired CA was common early during DKA.                                                                                                                                          |
| Tontisirin et al (2007) <sup>77</sup> | sARI                                              | 0.4            | 48 children                                      | No gender differences in terms of CA, girls between 4-8 years of age had higher middle cerebral and basilar artery blood flow velocity than age-matched boys.                     |
| Vavilala et al (2002) <sup>76</sup>   | dARI                                              | NA<br>(0→9)    | 17 healthy adolescent                            | Adolescents had significantly lower ARI, higher Vmca than adults.                                                                                                                 |
| Vavilala et al (2005) <sup>78</sup>   | ARI                                               | 0.4            | 26 children/adolescent                           | Intact CA but difference in gender between anterior & posterior circulation, girls had higher middle cerebral artery and basilar artery velocity.                                 |
| Vu et al (2022) <sup>75</sup>         | COx                                               | NA             | 50 children CCH<br><br>100 healthy controls      | CA appears to be intact in congenital central hypoventilation patients, however when BP is below the LLA greater hypotension were observed.                                       |
| Wagner et al (2011) <sup>80</sup>     | ΔHb oxygenation<br>/ΔHb volume                    | NA             | 24 patients (11 newborns<br>and 13 children)     | The correlation between ΔHb oxygenated and ΔCBF after single phenylephrine dose could be a reliable method for CA assessment.                                                     |

#### **PEDIATRIC AND NEONATAL CARDIAC SURGERY (12)**

| <i>Authors</i> | <i>CA Monitoring</i> | <i>Cut-off</i> | <i>Patient population</i> | <i>Results</i> |
|----------------|----------------------|----------------|---------------------------|----------------|
|----------------|----------------------|----------------|---------------------------|----------------|

|                                             |                                           |     |                                                                   |                                                                                                                                                                                                     |
|---------------------------------------------|-------------------------------------------|-----|-------------------------------------------------------------------|-----------------------------------------------------------------------------------------------------------------------------------------------------------------------------------------------------|
|                                             |                                           |     |                                                                   |                                                                                                                                                                                                     |
| Bassan et al. (2005) <sup>90</sup>          | MAP-HbD correlation                       | NA  | 43 infants undergoing CPB                                         | Found disturbed CA in 51% of subjects on a fluctuating basis, with abnormalities seen during about 15% the studied time.                                                                            |
| Brady et al. (2010) <sup>85</sup>           | COx                                       | 0.4 | 54 children undergoing CPB                                        | Hypotension was associated with increased COx. The LLA was identified in 77% pt.                                                                                                                    |
| Busch et al. (2020) <sup>96</sup>           | Microvascular CBF, total Hb concentration | NA  | 9 children on ECMO                                                | Unable to identify impaired CA.                                                                                                                                                                     |
| Cabrera et al. (2018) <sup>88</sup>         | HVx                                       | 0   | 16 pts- superior cavopulmonary anastomosis (BCPA)                 | Elevated ABP post-BCPA is associated with impaired CA, and elevated PAP. Hypotension is not associated with dysregulation.                                                                          |
| Easley et al. (2018) <sup>87</sup>          | HVx                                       | 0.3 | 57 children CPB                                                   | Optimal ABP (48+-11mHg) was identified in all patients and LLA in 82%. There was a significant association between an individual's peak CA and GFAP value.                                          |
| Joram N et al. (2021a) <sup>93</sup>        | COx                                       | 0.3 | 30 children on ECMO V-V, V-A                                      | Relationship between PaCO <sub>2</sub> and CA, influenced BP. Low MAP, hypercapnia may disturb CA as it increases LLA.                                                                              |
| Joram N. et al. (2021b) <sup>92</sup>       | COx                                       | 0.3 | 29 children on ECMO V-V, V-A                                      | Children who developed an acute neurological event had higher COx values and spent more time above the autoregulatory threshold of COx > 0.3.                                                       |
| Ortega et al (2019) <sup>95</sup>           | MAP-CrSO <sub>2</sub> Wavelet COH         | NA  | 20 children on ECMO<br><br>CA measured in 13 children, 5 controls | They showed a significant relationship between adaptive immune response brain peptides in circulating B and T cells) with acquired brain injury and loss of autoregulation using linear regression. |
| Smith et al. (2017) <sup>86</sup>           | HVx                                       | NA  | 72 neonates undergoing CPB                                        | Hypothermia & hypotension was associated with a more positive HVx value, but uncertainty if hypotension or hypothermia were the cause for impaired CA.                                              |
| Tian et al. (2021) <sup>94</sup>            | MAP-CrSO <sub>2</sub> COH<br>And wCOx     | NA  | 148 infants with respiratory insufficiency                        | The ischemic group showed CA abnormalities associated with low BP and the haemorrhagic group showed abnormalities associated with higher BP. MRI scans were used.                                   |
| Votava-Smith J. et al. (2017) <sup>89</sup> | MAP-CrSO <sub>2</sub> COH                 | 0.5 | 24 neonates with CHD                                              | Impaired CA in preoperative infants with full-term congenital heart disease.                                                                                                                        |

|                                   |                     |                    |                      |                                                                                                                                                                                                                                              |
|-----------------------------------|---------------------|--------------------|----------------------|----------------------------------------------------------------------------------------------------------------------------------------------------------------------------------------------------------------------------------------------|
| Zipfel et.al (2022) <sup>91</sup> | COx, HVx,<br>ABPopt | COx 0.4<br>HVx 0.3 | 36 infants after CPB | Optimal MAP identified in 88.9% with the HVx and in 91.7% of children with the COx and LLA could be found in 66.7% and 63.9% of patients, respectively. LLA is higher than the therapeutic goals of patient care reported in the literature. |
|-----------------------------------|---------------------|--------------------|----------------------|----------------------------------------------------------------------------------------------------------------------------------------------------------------------------------------------------------------------------------------------|

### NEONATAL STUDIES (78)

| <i>Authors</i>                            | <i>CA Monitoring</i>                     | <i>Cut-off</i> | <i>Study population</i>                                                                                                                            | <i>Results</i>                                                                                                                       |
|-------------------------------------------|------------------------------------------|----------------|----------------------------------------------------------------------------------------------------------------------------------------------------|--------------------------------------------------------------------------------------------------------------------------------------|
| Alderliesten et al. (2013) <sup>127</sup> | COx                                      | 0.5            | 90 preterm infants (IVH=30, controls=60) aged 0-72h                                                                                                | Altered CA significantly more often before mild/moderate and severe IVH vs. no IVH.                                                  |
| Baerts et al. (2013) <sup>138</sup>       | COx                                      | 0.5            | 36 preterm infants (GA 25-29 weeks) aged 0-24h (antenatal tocolytic indomethacin=18, controls=18)                                                  | No significant difference in the prevalence of impaired CA.                                                                          |
| Beausoleil et al. (2018) <sup>150</sup>   | COH and TF gain<br>CrSO <sub>2</sub> -HR | NA             | 19 preterm infants <28 weeks GA aged 0-72h (pulmonary haemorrhage /IVH=8; controls=11)                                                             | IVH-pulmonary haemorrhage associated with lower cross-correlation, in-phase semblance and TF gain coefficients compared to controls. |
| Boylan et al. (2000) <sup>158</sup>       | MAP-CBFV<br>gradient                     | NA             | 25 term & preterm infants (GA 26-42 week)<br><br>(high-risk term infants = 11, high-risk preterm infants =3, term controls =5, preterm controls=7) | Intact CA in term controls without neurologic impairment; altered CA in term and preterm high-risk infants and in preterm controls.  |

|                                            |                                                                                         |                          |                                                                                                                                    |                                                                                                                                                                                                                   |
|--------------------------------------------|-----------------------------------------------------------------------------------------|--------------------------|------------------------------------------------------------------------------------------------------------------------------------|-------------------------------------------------------------------------------------------------------------------------------------------------------------------------------------------------------------------|
| Burton et al (2015) <sup>169</sup>         | HVx                                                                                     | ABPopt=<br>lowest<br>HVx | 28 term neonates with HIE<br>undergoing TH                                                                                         | ABP<ABPopt duration, deviation and higher ABPopt during rewarming associated with poorer psychomotor outcomes at 2 years.                                                                                         |
| Caicedo et al (2011a) <sup>107</sup>       | MAP-CrSO <sub>2</sub> , MAP-HbD correlation,<br>COH, partial COH                        | NA                       | 53 preterm infants (GA <32 weeks)                                                                                                  | Positive correlation between higher correlation values and CRIB score. No association with psychomotor outcomes.                                                                                                  |
| Caicedo et al (2011b) <sup>99</sup>        | COx<br>MAP-CrSO <sub>2</sub> COH                                                        | NA                       | 54 preterm infants                                                                                                                 | No significant differences between CA measured with two different NIRS devices (NIRO300 and INVOS4100).                                                                                                           |
| Caicedo et al. (2012) <sup>102</sup>       | COx<br>MAP-CrSO <sub>2</sub> COH<br>and TF gain                                         | NA<br>NA                 | 18 preterm infants (mean postmenstrual age 27.9 weeks)                                                                             | TF gain and COx are most robust methods for CA assessment compared to COH. TF can also assess the causal relationship between MAP and CBF.                                                                        |
| Caicedo et al (2013) <sup>139</sup>        | COx<br>MAP-CrSO <sub>2</sub> COH<br>and TF gain                                         | NA                       | 56 preterm infants (GA 24-31 weeks) aged 0-3 days (labetalol-treated maternal hypertension =21, other treatments =19, controls=16) | Greater CA impairment (higher TF gain) in infants born by labetalol-treated hypertensive mothers.                                                                                                                 |
| Caicedo et al. (2014) <sup>131</sup>       | Bivariate phase rectified signal averaging (BPRSA) between MAP/HR and CrSO <sub>2</sub> | NA                       | 9 preterm infants (GA<32 weeks; severe IVH= 5, no IVH=4).                                                                          | Different BPRSA dynamics between severe IVH infants and controls.                                                                                                                                                 |
| Carrasco et al. (2018) <sup>165</sup>      | HVx                                                                                     | ABPopt=<br>lowest<br>HVx | 25 term/near-term HIE<br>undergoing TH                                                                                             | ABP<ABPopt duration, deviation and higher ABPopt during rewarming associated with increased brain MRI abnormalities.                                                                                              |
| Chavez-Valdez et al. (2017) <sup>172</sup> | HVx                                                                                     | ABPopt=<br>lowest<br>HVx | 65 term HIE neonates<br>undergoing TH                                                                                              | ABP>ABPopt associated with shorter duration of intubation in boys but longer ventilatory support in girls.<br><br>ABP<ABPopt related to milrinone administration in girls and longer intensive care stay in boys. |

|                                       |                                       |                                  |                                                                                                         |                                                                                                                        |
|---------------------------------------|---------------------------------------|----------------------------------|---------------------------------------------------------------------------------------------------------|------------------------------------------------------------------------------------------------------------------------|
| Chen et al. (2022) <sup>163</sup>     | MAP-HbD COH<br>HVP<br>HV <sub>x</sub> | NA<br>NA<br>NA                   | 53 term HIE neonates undergoing TH                                                                      | Altered HV <sub>x</sub> during TH and MAP-HbD coherence during TH and rewarming associated with brain injury or death. |
| Chock et al. (2012) <sup>122</sup>    | CO <sub>x</sub>                       | 0.5                              | 40 preterm infants <1500 g (PDA ligation=10, indomethacin=12, conservative management = 6, controls=12) | PDA ligation associated with greater CA impairment than conservative/pharmacological management.                       |
| Chock et al. (2020) <sup>128</sup>    | CO <sub>x</sub>                       | 0.5                              | 103 preterm infants <32 weeks GA and <1250g aged 0-4 days                                               | Impaired CA in 80% of infants with adverse outcome (deceased or developing IVH/periventricular leukomalacia).          |
| Cimatti et al. (2020) <sup>154</sup>  | TOHR <sub>x</sub>                     | NA                               | 20 preterm infants (IVH=8, controls=12) aged 0-72h                                                      | Significantly higher TOHR <sub>x</sub> before IVH detection compared with controls.                                    |
| Cohen et al. (2019) <sup>113</sup>    | CO <sub>x</sub>                       | 0.5                              | 114 preterm infants (fetal growth restriction=57, matched controls=57) aged 0-72h                       | Higher CO <sub>x</sub> on day 2 and 3 in fetal growth-restricted neonates vs. controls.                                |
| Da Costa et al. (2015) <sup>110</sup> | TOHR <sub>x</sub>                     | ABPopt= lowest TOHR <sub>x</sub> | 60 preterm infants <32 weeks GA                                                                         | TOHR <sub>x</sub> used to define individual ABPopt.                                                                    |
| Da Costa et al (2018) <sup>111</sup>  | TOHR <sub>x</sub>                     | ABPopt= lowest TOHR <sub>x</sub> | 44 preterm infants <28 weeks GA aged 0-24h <sup>75</sup>                                                | ABP<ABPopt deviations associated with increased mortality and IVH rates.                                               |
| Da Costa et al. (2019) <sup>132</sup> | CO <sub>x</sub><br>TOHR <sub>x</sub>  | NA<br>NA                         | 43 preterm infants (IVH=14, controls=29) aged 0-48h                                                     | No difference in mean CO <sub>x</sub> and TOHR <sub>x</sub> between IVH and no-IVH groups.                             |



|                                      |                                   |                                                   |                                                                                                                                          |                                                                                                                                                                                                |
|--------------------------------------|-----------------------------------|---------------------------------------------------|------------------------------------------------------------------------------------------------------------------------------------------|------------------------------------------------------------------------------------------------------------------------------------------------------------------------------------------------|
| Eriksen et al (2015) <sup>103</sup>  | COx<br>MAP-CrSO <sub>2</sub> COH  | 0.4<br>0.5                                        | 60 preterm infants <32 weeks GA aged 0-24h                                                                                               | Weak correlation between COx and coherence coefficient.<br>COx appeared as a more robust and simpler method to describe CA.                                                                    |
| Eriksen et al. (2014) <sup>140</sup> | COx                               | NA                                                | 60 preterm infants <32 weeks GA (13 treated with dopamine) aged 0-24h                                                                    | Greater CA impairment (higher COx) in association with dopamine treatment.                                                                                                                     |
| Fenton et al. (1992) <sup>145</sup>  | CO <sub>2</sub> -MAP-CBFV changes | NA                                                | 94 ventilated preterm infants (≤33 weeks GA)                                                                                             | Altered CA in infants ≤30 weeks GA.                                                                                                                                                            |
| Gilmore et al. (2011) <sup>174</sup> | COx                               | 0.5                                               | 23 preterm infants ≤30 weeks GA aged 0-72h                                                                                               | No association between neurologic injury and %time with COx>0.5.                                                                                                                               |
| Gilmore et al (2021) <sup>133</sup>  | HVx                               | ABPopt=<br>lowest<br>HVx                          | 63 term HIE neonates undergoing TH                                                                                                       | MABP>ABPopt duration on day 3, but not earlier, associated with brain injury.                                                                                                                  |
| Govindan et al (2016) <sup>151</sup> | MAP-HbD COH<br>HR-HbD COH         | 0.384                                             | 82 term/ preterm infants (GA: 23-41 weeks)-HIE infants=43; CHD=19; preterm undergoing PDA ligation=12; preterm early postnatal period=8. | Poor agreement between MAP-HbD and HR-HbD COH in the left and right hemispheres.<br>Baroreflex failure (COH MAP-HR not significant) may affect HR reliability for the detection of altered CA. |
| Govindan et al (2020) <sup>177</sup> | MAP-HbD COH                       | NA                                                | 68 infants (preterm infants=19; CHD=11; HIE=38).                                                                                         | Ventilator-related CBV fluctuations, sedatives and pCO <sub>2</sub> associated with MAP/HbD; cerebral pressure passivity associated with brain injury development.                             |
| Hahn et al (2012) <sup>136</sup>     | MAP-CrSO <sub>2</sub> COH         | 0.45 (low frequency)<br>0.47 (very low frequency) | 60 preterm infants ≤32 weeks' GA aged 0-3 days                                                                                           | Greater CA impairment at decreasing MAP.                                                                                                                                                       |

|                                        |                                                       |                    |                                                                 |                                                                                                                                                                        |
|----------------------------------------|-------------------------------------------------------|--------------------|-----------------------------------------------------------------|------------------------------------------------------------------------------------------------------------------------------------------------------------------------|
| Hanigan & Bogner (2010) <sup>176</sup> | MAP-CBF correlation (measured with thermal diffusion) | NA                 | 9 neonates undergone CSF diversion for congenital hydrocephalus | Absence of CA associated with death or severe developmental delay.                                                                                                     |
| Hoffman et al (2019) <sup>126</sup>    | COx                                                   | 0.5                | 61 preterm infants (GA 23-29 weeks) aged 0-96h                  | In infants without adverse outcomes, %time with COx>0.5 decreased by postnatal day. Infants with IVH or who died spent more %time with COx>0.5 compared with controls. |
| Hoffman et al (2021) <sup>118</sup>    | COx                                                   | NA                 | 61 preterm infants <29 weeks aged 0-96h                         | Inverse correlation between COx and pCO <sub>2</sub> on day 1.                                                                                                         |
| Howlett et al (2013) <sup>168</sup>    | HVx                                                   | ABPopt= lowest HVx | 24 term HIE neonates undergoing TH                              | ABP<ABPopt duration during TH and rewarming associated with moderate-severe brain MRI abnormalities.                                                                   |

|                                          |                                                        |    |                                                                           |                                                                                                               |
|------------------------------------------|--------------------------------------------------------|----|---------------------------------------------------------------------------|---------------------------------------------------------------------------------------------------------------|
| Huvanandana et al. (2019) <sup>147</sup> | COx<br>MAP-CrSO <sub>2</sub> COH and cross-correlation | NA | 30 preterm infants <34 weeks GA aged 2.6±2.2 days receiving caffeine load | Improved CA (reduced COx and MAP-CrSO <sub>2</sub> cross-correlation) following caffeine load administration. |
|------------------------------------------|--------------------------------------------------------|----|---------------------------------------------------------------------------|---------------------------------------------------------------------------------------------------------------|

|                                        |                                                            |           |                                                                                      |                                                                                                                   |
|----------------------------------------|------------------------------------------------------------|-----------|--------------------------------------------------------------------------------------|-------------------------------------------------------------------------------------------------------------------|
| Jayasinghe et al (2003) <sup>119</sup> | Xe-133 CBF-MAP correlation                                 | 95% CI >0 | 16 preterm infants (GA range 24-32 weeks; 5 normotensive, 11 hypotensive) aged 0-96h | Altered CA (MAP-CBF reactivity 1.9% [95% CI 0.8-3.0%]/mmHg) in hypotensive infants.                               |
| Kaiser et al (2005) <sup>117</sup>     | MAP-CBFV correlation slope                                 | 0         | 43 ventilated preterm infants aged 0-7 days                                          | The autoregulatory slope progressively increases at PaCO <sub>2</sub> ≥45mmHg, suggesting loss of CA.             |
| Kim et al. (2020) <sup>124</sup>       | Correlation between systolic, mean, diastolic ABP and CBFV | 0         | 113 preterm infants (GA range 23-29 weeks) aged 0-7 days                             | Intact CA during systole regardless of PDA size, while during diastole proved better in infants with a large PDA. |

|                                       |                                  |                           |                                                                                                                         |                                                                                                                                                             |
|---------------------------------------|----------------------------------|---------------------------|-------------------------------------------------------------------------------------------------------------------------|-------------------------------------------------------------------------------------------------------------------------------------------------------------|
| Kooi et al. (2020) <sup>123</sup>     | COx                              | NA                        | 27 preterm infants <32 weeks GA undergone PDA ligation                                                                  | Impaired CA during and up to 12h after surgical PDA ligation.                                                                                               |
| Kuik et al. (2018) <sup>121</sup>     | MAP-cFTOE correlation            | -0.3                      | 19 preterm <32 weeks GA undergoing laparotomy due to NEC/spontaneous intestinal perforation                             | Greater CA impairment during surgery than before/after surgery,<br>Higher PaCO <sub>2</sub> associated with a greater risk of CA impairment during surgery. |
| Lee et al (2017a) <sup>173</sup>      | HVx                              | ABPopt=<br>lowest<br>HVx  | 75 term HIE neonates undergoing TH                                                                                      | ABP<ABPopt during normothermia associated with liver injury.                                                                                                |
| Lee et al (2017b) <sup>167</sup>      | HVx                              | ABPopt=<br>lowest<br>HVx  | 64 HIE neonates undergoing TH                                                                                           | ABP<ABPopt duration and deviation during TH and rewarming associated with increased brain MRI abnormalities.                                                |
| Lemmers et al (2006) <sup>115</sup>   | COx<br><br>MAP-cFTOE correlation | 0.5<br><br>-0.5           | 38 preterm infants <32 weeks GA with (n=18) and without respiratory distress (n=20) aged 0-72h                          | Greater duration of CA impairment in infants with respiratory distress.                                                                                     |
| Li et al (2016) <sup>148</sup>        | COx                              | NA                        | 44 preterm infants (GA range 27-31) receiving surfactant via less-invasive technique (n=22) or endotracheal tube (n=22) | Impaired CA during and after surfactant administration; shorter effect after less-invasive technique than endotracheal instillation (<5 min vs. 5–10 min).  |
| Li et al. (2023) <sup>161</sup>       | HVP                              | NA                        | 53 HIE neonates undergoing TH                                                                                           | Association between plasma biomarkers of brain injury and dysfunctional CA.                                                                                 |
| Lightburn et al (2013) <sup>142</sup> | %change of CBFV per MAP          | 0                         | 15 hypotensive preterm infants <28 weeks GA aged 0-24h.                                                                 | Pressure-passive CBFV increase as MAP was optimized by dopamine treatment.                                                                                  |
| Liu et al (2021) <sup>171</sup>       | wHVx                             | ABPopt=<br>lowest<br>wHVx | 63 term HIE neonates undergoing TH                                                                                      | ABP>ABPopt with upper MAP=50-60 mmHg during TH may reduce the risk of brain injury.                                                                         |

|                                            |                      |          |                                                                                                                             |                                                                                                                                                                                |
|--------------------------------------------|----------------------|----------|-----------------------------------------------------------------------------------------------------------------------------|--------------------------------------------------------------------------------------------------------------------------------------------------------------------------------|
| Martini et al. (2022) <sup>153</sup>       | TOHRx                | NA       | 77 preterm infants <32 weeks GA aged 0-72h (IVH=16)                                                                         | Greater CA impairment associated with haemodynamically significant PDA, ongoing dopamine treatment, increasing mortality scores and high-grade IVH.                            |
| Massaro et al (2015) <sup>160</sup>        | MAP-HbD COH          | NA       | 36 term or near-term neonates with moderate to severe HIE during TH                                                         | Increased time with impaired CA in both cerebral hemispheres associated with higher rates of death or brain injury at MRI.                                                     |
| Massaro et al. (2021) <sup>162</sup>       | HVP                  | 0.34     | 50 term/near-term HIE neonates undergoing TH                                                                                | HVP >0.34 at 24h of life predicted death or severe brain injury and death or developmental delay.                                                                              |
| Menke et al (1993) <sup>97</sup>           | MAP-CBFV correlation | NA       | 16 ventilated preterm infants <33 weeks GA aged 2-8 days                                                                    | CA capacity of 7.5% (-12.5 to 20.1%) rise in CBFV/1 kPa rise in MABP.                                                                                                          |
| Menke et al (1997) <sup>98</sup>           | MAP-CBFV COH         | NA       | 15 ventilated preterm infants (GA range 25-32) aged 1-3 days                                                                | Initially reduced CA capacity, with progressive improvement during the monitoring period.                                                                                      |
| Mitra et al (2014) <sup>152</sup>          | TOHRx                | NA       | 31 preterm infants <28 weeks GA aged 0-72h                                                                                  | TOHRx inversely correlated with GA, birth weight and positively correlated with higher CRIB II index.                                                                          |
| Munro et al (2004) <sup>109</sup>          | MAP-CBF correlation  | NA       | 17 preterm infants <28 weeks GA (12 hypotensive and treated with dopamine) aged 0-2 days                                    | Impaired CA in hypotensive infants before and during dopamine treatment, but not in normotensive infants.<br>A breakpoint at MAP <30 mmHg was identified in untreated infants. |
| O'Leary et al (2009) <sup>130</sup>        | MAP-HbD TF gain      | NA       | 88 preterm 0-5 days (GA range: 23-30 weeks; IVH=37, Early parenchymal echodensities =10, late parenchymal abnormalities=19) | Significant association between altered CA and IVH development.                                                                                                                |
| Pfurtscheller et al. (2022) <sup>116</sup> | COx                  | NA<br>NA | 47 preterm infants (GA ≤36 weeks) with (n=25) and without (n=22)                                                            | Significant association between altered CA and need for respiratory support.                                                                                                   |

|                                        |                                                                        |                                            |                                                                                                                                  |                                                                                                                                                                                     |
|----------------------------------------|------------------------------------------------------------------------|--------------------------------------------|----------------------------------------------------------------------------------------------------------------------------------|-------------------------------------------------------------------------------------------------------------------------------------------------------------------------------------|
|                                        | MAP-cFTOE correlation                                                  |                                            | respiratory support, monitored during the first 15min after birth                                                                |                                                                                                                                                                                     |
| Polavarapu et al (2018) <sup>114</sup> | COx                                                                    | 0.5                                        | 46 preterm infants (GA 23-29 weeks) with (=25) and without (=21) abnormal antenatal Doppler aged 0-4 days                        | Antenatal brain sparing associated with impaired CA at 24- 48h of life and increased risk of severe IVH and/or death.                                                               |
| Pryds et al (1989) <sup>125</sup>      | Xe-133 CBF-MAP correlation                                             | 95% CI >0                                  | 57 preterm infants (GA <35 weeks) aged 0-48h (mild intracranial haemorrhage=9, severe intracranial haemorrhage =10, controls=38) | Significant CA impairment in infants developing severe IVH vs. controls.                                                                                                            |
| Pryds et al (1990) <sup>157</sup>      | Xe-133 CBF-MAP correlation                                             | NA                                         | 31 term neonates (perinatal asphyxia=19, controls=12) aged 0-24h                                                                 | Abolished CA and increased CBF in asphyxiated infants who died or developed severe brain damage.                                                                                    |
| Rhee et al. (2014) <sup>106</sup>      | Correlation between systolic, mean, diastolic ABP and CBFV             | NA                                         | 179 preterm infants (GA 23-33 weeks) aged 0-7 days                                                                               | Pressure-passive systolic CBFV at lowest GA.<br>Systolic CA capacity improved with increasing GA.<br>Diastolic CA capacity altered in all subjects with minimal GA-related changes. |
| Richter et al. (2020) <sup>112</sup>   | COx                                                                    | 0.5                                        | 53 preterm infants <32 weeks GA aged 0-5 days                                                                                    | Greater CA impairment in infants with antenatal brain sparing.                                                                                                                      |
| Riera et al. (2014) <sup>100</sup>     | Bivariate autoregressive spectral COH (BiAR-COH) MAP-CrSO <sub>2</sub> | 0.57 to detect low superior vena cava flow | 54 ventilated preterm infants <31 weeks GA aged 0-4 days                                                                         | Greater CA impairment predicted severe IVH and mortality.                                                                                                                           |

|                                         |                                                                                      |                                            |                                                                                                          |                                                                                                                         |
|-----------------------------------------|--------------------------------------------------------------------------------------|--------------------------------------------|----------------------------------------------------------------------------------------------------------|-------------------------------------------------------------------------------------------------------------------------|
| Riera et al. (2016) <sup>101</sup>      | Partial directed COH (PDC) MAP-CrSO <sub>2</sub>                                     | 0.55 to detect low superior vena cava flow | 54 preterm infants <30 weeks GA aged 0-2 days                                                            | Greater CA impairment predictive of severe IVH and mortality.                                                           |
| Schat et al. (2016) <sup>120</sup>      | MAP-cFTOE correlation                                                                | NA                                         | 28 preterm infants (15 with necrotizing enterocolitis [NEC] and 13 controls)                             | Impaired CA in 60% of infants with NEC vs. 38% of infants without NEC (not significant).                                |
| Solanki & Hoffman (2020) <sup>141</sup> | COx                                                                                  | 0.5                                        | 61 preterm infants (GA range 24-30 weeks) aged 0-96h                                                     | Impaired CA associated with dopamine exposure in a dose-dependent fashion (peak at a concentration of 11–15 µg/kg/min). |
| Soul et al. (2007) <sup>105</sup>       | MAP-HbD COH                                                                          | 0.5                                        | 90 preterm infants (GA 23-30 weeks) aged 0-5 days                                                        | Impaired CA in 87/90 infants and associated with low GA and BW, systemic hypotension, and maternal hemodynamic factors. |
| Sunwoo et al. (2022) <sup>149</sup>     | RiSC (average sliding correlation index between scalp blood flow and CBF, using DCS) | NA                                         | 19 preterm infants (GA <28 weeks, IVH=9) aged 2-5 days                                                   | Higher RiSC in severe IVH occurring within 72 h of life.                                                                |
| Tekes et al (2015) <sup>166</sup>       | HVx                                                                                  | ABPopt= lowest HVx                         | 27 HIE neonates undergoing TH                                                                            | ABP<ABPopt deviation during TH and rewarming associated with increased brain MRI abnormalities.                         |
| Thewissen et al (2018) <sup>144</sup>   | MAP-CrSO <sub>2</sub> COH                                                            | 0.3                                        | 22 preterm infants <37 weeks receiving propofol for intubation                                           | Impaired CA in one patient during propofol-related hypotension and in 5 patients with normal-to-raised MABP.            |
| Thewissen et al (2021) <sup>143</sup>   | MAP-CrSO <sub>2</sub> COH                                                            | NA                                         | 89 preterm infants <28 weeks GA (hypotensive = 36, 13 treated with dopamine, 16 with placebo) aged 0-72h | Impaired CA in hypotensive vs. normotensive infants.<br>No CA difference between dopamine and placebo.                  |

|                                              |                               |                                        |                                                                                                                          |                                                                                                                                                                 |
|----------------------------------------------|-------------------------------|----------------------------------------|--------------------------------------------------------------------------------------------------------------------------|-----------------------------------------------------------------------------------------------------------------------------------------------------------------|
| Tian et al. (2016) <sup>159</sup>            | MAP-CrSO <sub>2</sub> COH     | NA                                     | 9 term neonates with HIE during TH                                                                                       | Increased in-phase and anti-phase coherence associated with worse outcomes (death, brain MRI injury, abnormal neurodevelopment).                                |
| Tian et al. (2021) <sup>175</sup>            | MAP-HbD COH                   | NA                                     | 14 term and near-term neonates with mild HIE                                                                             | No CA difference between brain areas with and without MRI lesions.                                                                                              |
| Tsuji et al (2000) <sup>129</sup>            | MAP-HbD COH                   | 0.5                                    | 32 preterm infants (GA 23-31 weeks) aged 0-3 days                                                                        | Impaired CA in 53% of the study population, of which 47% developed severe brain lesions. Among infants with intact CA, only 13% developed severe brain lesions. |
| Van de Bor et al (1991) <sup>108</sup>       | MAP-CBFV correlation          | NA                                     | 48 preterm infants ≤32 weeks GA aged 12-72h                                                                              | Preserved CA for MAP ranging from 31 to 40 mmHg.                                                                                                                |
| Vedrenne-Cloquet et al (2019) <sup>146</sup> | MAP-cFTOE correlation         | NA                                     | 22 preterm and term infants receiving atropine-propofol (n=11) vs. atropine-atracurium-sufentanil (n=13) for intubation. | No correlation between MAP and cFTOE in both pharmacological groups.                                                                                            |
| Verma et al (2000) <sup>137</sup>            | MAP-CBFV correlation slope    | NA                                     | 62 term and preterm neonates aged 2-72h                                                                                  | MAP-CBFV slope decreased at increasing GA.<br>No significant correlations with PaCO <sub>2</sub> and postnatal age.                                             |
| Vesoulis et al. (2016) <sup>104</sup>        | MAP-CrSO <sub>2</sub> TF gain | NA                                     | 62 infants <28 weeks GA aged 0-72h                                                                                       | Increasing CA capacity for increasing GA and birth weight z score; weaker CA capacity in African-American infants and in association with IVH.                  |
| Vesoulis et al (2018) <sup>170</sup>         | COx                           | ABPopt= positive to negative COx shift | 16 term/near term HIE neonates undergoing TH                                                                             | ABP>ABPopt duration on day 3, but not earlier, associated with brain injury.                                                                                    |
| Vesoulis et al. (2019) <sup>134</sup>        | MAP-CrSO <sub>2</sub> TF gain | NA                                     | 45 preterm infants <28 weeks GA (delayed cord clamping, n=15; controls, n=30) aged 0-24h                                 | Delayed cord clamping associated with improved CA capacity; improved CA capacity associated with decreased IVH risk.                                            |
| Wong et al. (2008) <sup>135</sup>            | MAP-CrSO <sub>2</sub> COH     | 0.5                                    | 24 preterm infants <32 weeks' GA aged 0-2 days                                                                           | Impaired CA associated with lower GA, BW, MAP, and higher mortality.                                                                                            |

**Abbreviations:** *ABP* arterial blood pressure; *ABPopt* ABP optimum; *BPCA* bidirectional cavopulmonary anastomosis; *BW* birth weight; *CA* cerebral autoregulation; *CBF* cerebral blood flow; *CBFV* cerebral blood flow velocity; *cFTOE*, cerebral fraction of tissue oxygen extraction; *CHD* congenital heart disease; *COH* coherence; *COx* cerebral oxygenation index; *CO<sub>2</sub>* carbon dioxide; *CPB* cardiopulmonary bypass; *CrSO<sub>2</sub>* cerebral regional oxygen saturation; *dARI* dynamic autoregulatory index; *DATA CAR* dynamic adaptive target of active cerebral autoregulation; *DCS* diffuse correlation spectroscopy; *DKA* diabetes ketoacidosis; *ECMO V-A* Veno-arterial extracorporeal membrane oxygenation; *ECMO V-V* Veno-venous extracorporeal membrane oxygenation, *GA* gestational age; *GFAP* glial fibrillary acidic protein; *HbD* oxygenated haemoglobin; *HIE* hypoxic-ischemic encephalopathy; *HR* heart rate; *HVx* haemoglobin volume reactivity index; *HVP* haemoglobin volume phase index; *IVH* intraventricular haemorrhage; *LAx* low frequency autoregulation index; *LLA* lower limit of autoregulation; *Mx* mean flow index; *MAP* mean arterial pressure; *MAPopt* MAP optimum; *MRI* magnetic resonance imaging; *mTBI* mild TBI, *moTBI* moderate TBI; *NA* not available; *NIRS* near infrared spectroscopy; *PAP* pulmonary artery pressure; *P<sub>Ax</sub>* pulse amplitude index; *PaCO<sub>2</sub>* partial pressure carbon dioxide; *PDA* patent ductus arteriosus; *PI* Pulsatility index; *PRx* pressure reactivity index; *pt* patient; *RoR* rate of autoregulation; *sTBI* severe TBI; *TBI* traumatic brain injury; *TCD* transcranial Doppler sonography; *TF* transfer function; *TH* therapeutic hypothermia; *TOHRx* tissue oxygenation heart rate index; *wCOx* wavelet COx; *wPRx* wavelet PRx; *Xe* xenon.
